# Supplementary material for: Quantifying transboundary transport flux of CO over the Tibetan Plateau: variabilities and drivers
Source: Copernicus journal article supplement (doi:10.5194/acp-25-6823-2025), 2025-07-04
Supplement: Supplementary file 1 [file acp-25-6823-2025-supplement.pdf]

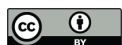

*Supplement of*

## **Quantifying transboundary transport flux of CO over the Tibetan Plateau: variabilities and drivers**

**Zhenda Sun et al.**

*Correspondence to:* Youwen Sun (ywsun@aiofm.ac.cn) and Cheng Liu (chliu81@ustc.edu.cn)

The copyright of individual parts of the supplement might differ from the article licence.

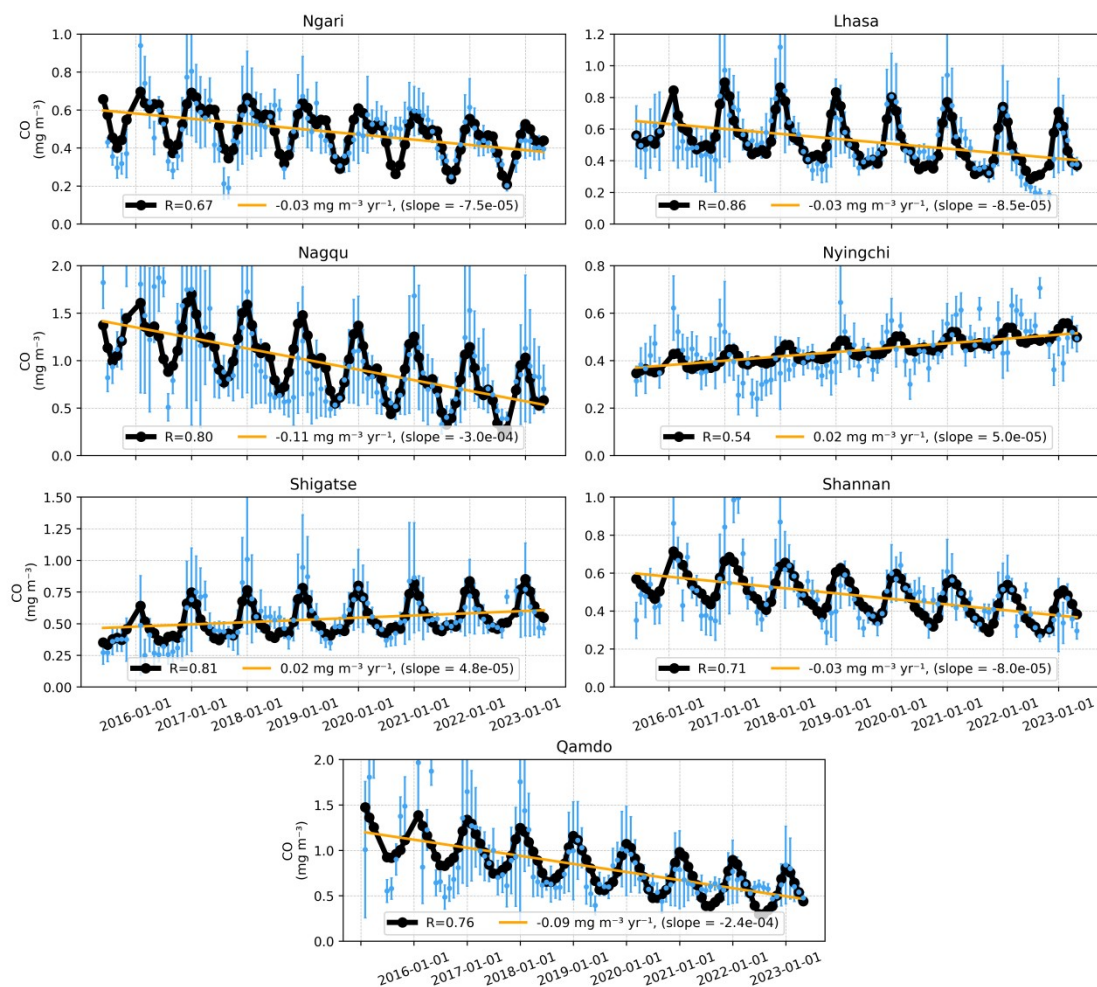

**Fig. S1.** Inter-annual variations of CO observed by CNEMC from 2015 to 2024. Blue dots represent the monthly mean CO concentration, with vertical error bars indicating the  $1\sigma$  standard deviation. The seasonal trend (black line) and inter-annual trend (orange line) are fitted using a seasonal cycle model.

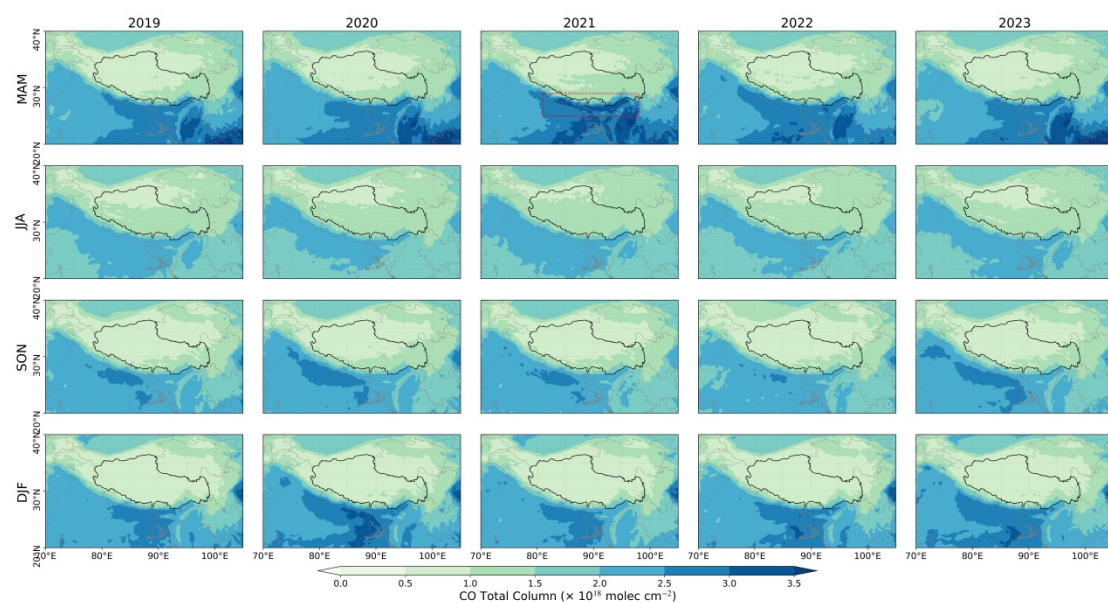

1 **Fig. S2.**The seasonal averages of TROPOMI CO total columns over the Tibetan Plateau during  
2 spring (MAM), summer (JJA), post-monsoon (SON), and winter (DJF), based on data collected  
3 from May 2019 to April 2023.

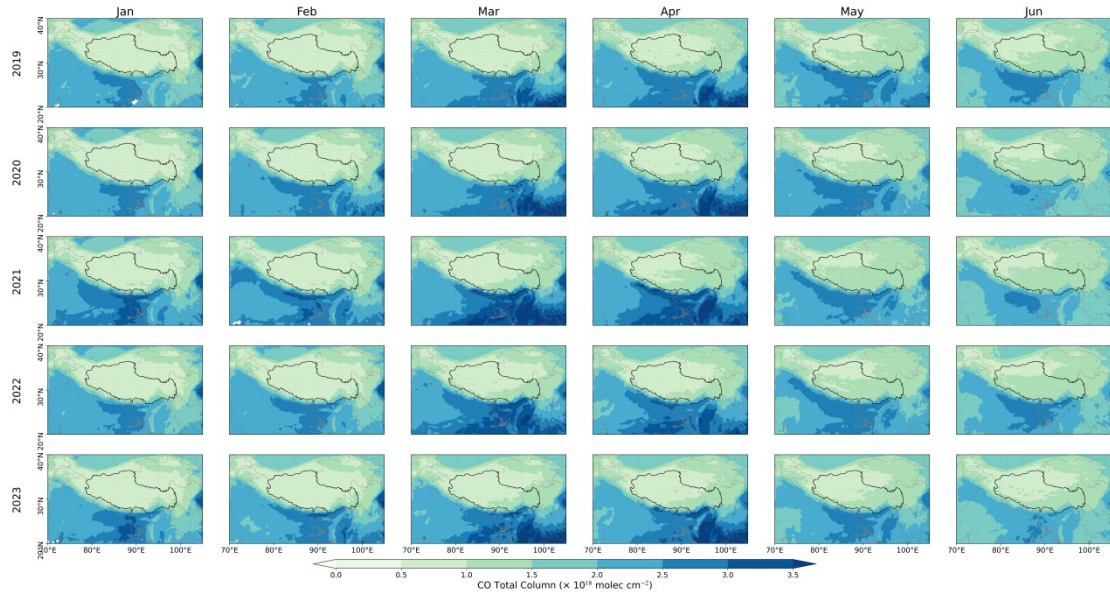

4  
5 **Fig. S3.**The monthly averages of TROPOMI CO total columns over the Tibetan Plateau from  
6 January to June, based on data collected from 2019 to 2023.

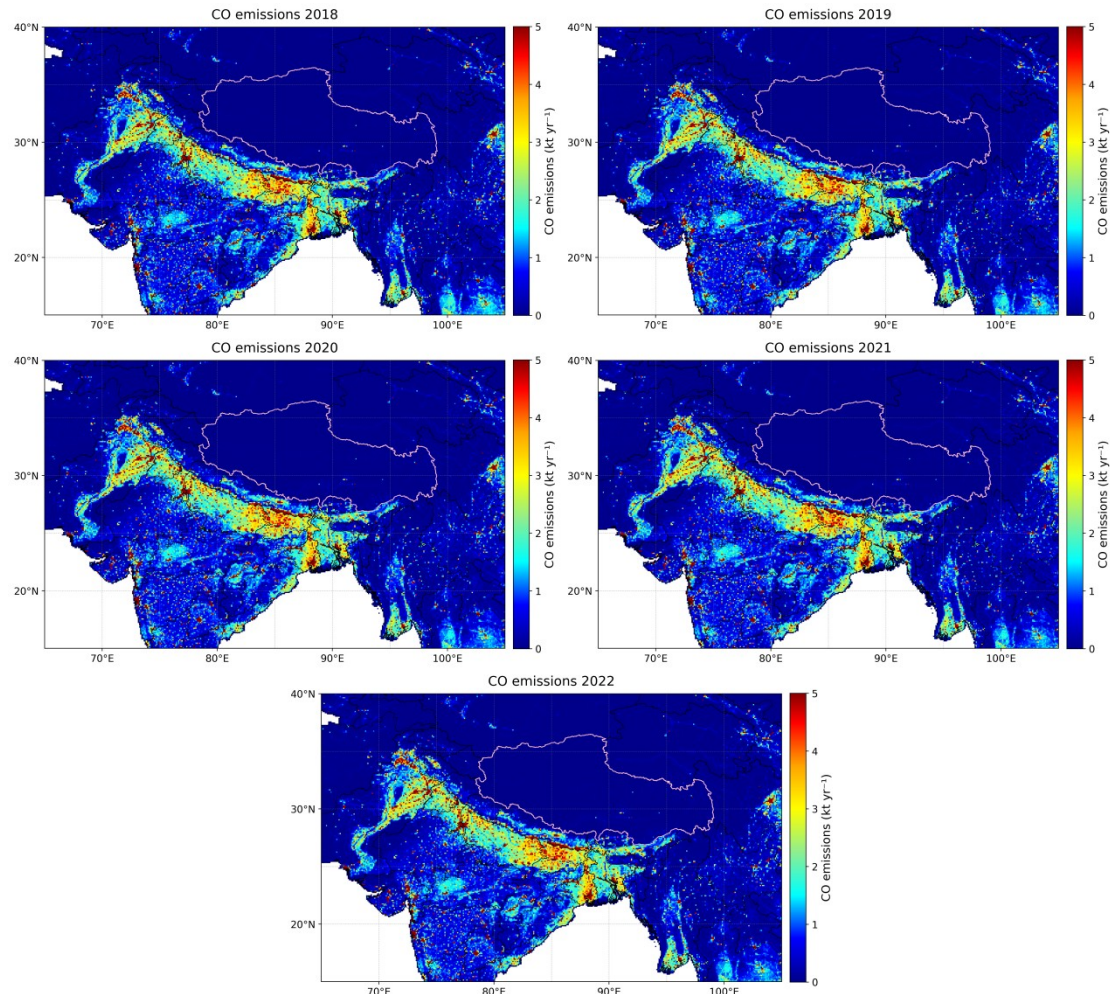



**Fig. S4.** Total CO emission distribution from 2018 to 2022 ( $0.1^\circ \times 0.1^\circ$ ) from the EDGAR Emission Inventory over the Qinghai-Tibet Plateau and surrounding regions, excluding emissions from large-scale biomass burning, savannah burning, forest fires, and sources and sinks from land-use, land-use change, and forestry (LULUCF). Units are in  $\text{kg} / \text{m}^2 / \text{s}$ . The Tibetan Plateau is marked with a pink outline.

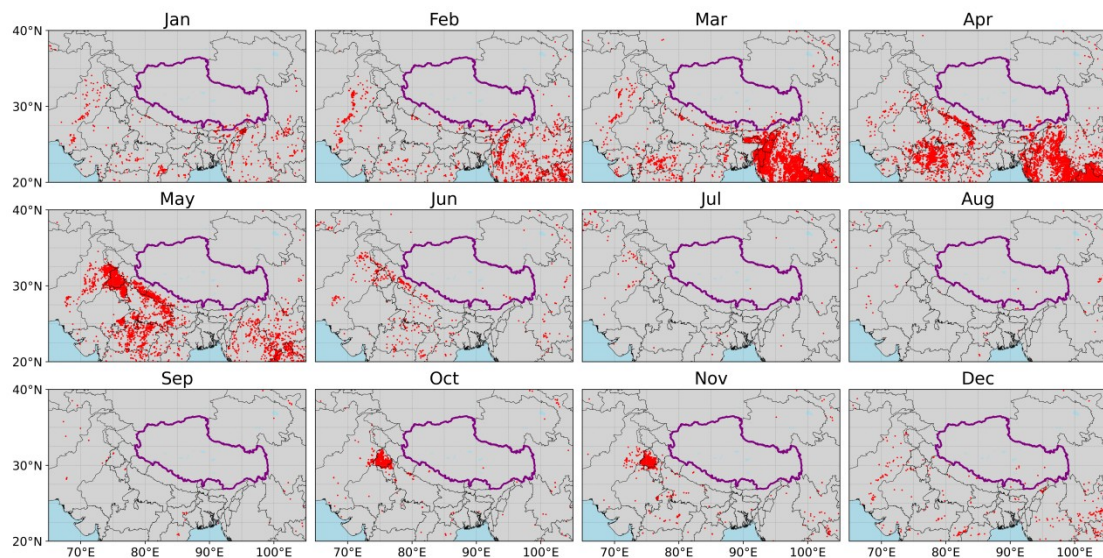

**Fig. S5.** Monthly aggregated distribution of MODIS fire points over the Qinghai-Tibet Plateau and surrounding regions from January to December 2019. The purple line delineates the boundary of the Tibetan Plateau.

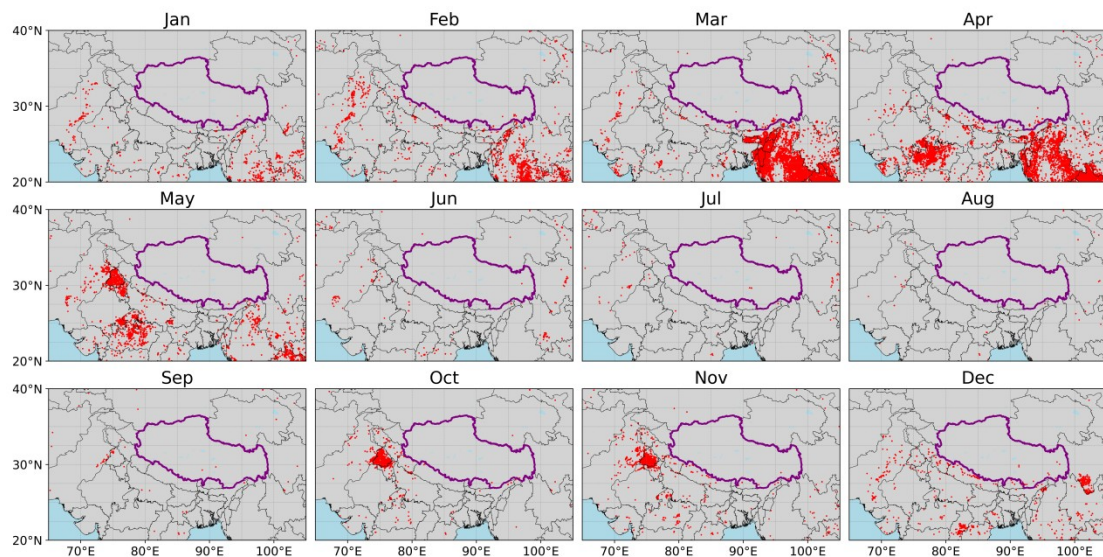

**Fig. S6.** Monthly aggregated distribution of MODIS fire points over the Qinghai-Tibet Plateau and surrounding regions from January to December 2020. The purple line delineates the boundary of the Tibetan Plateau.

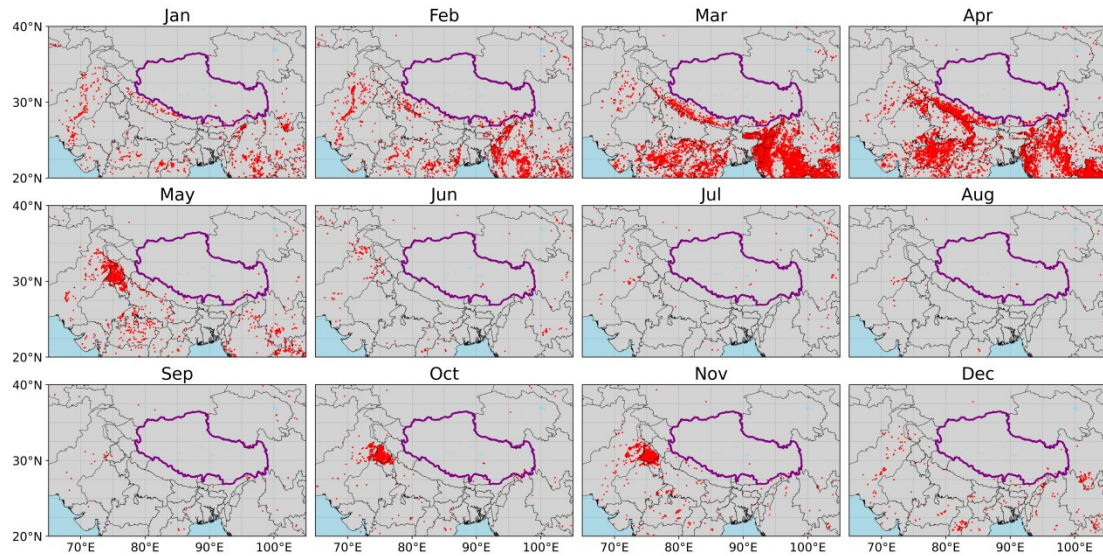

**Fig. S7.** Monthly aggregated distribution of MODIS fire points over the Qinghai-Tibet Plateau and surrounding regions from January to December 2021. The purple line delineates the boundary of the Tibetan Plateau.

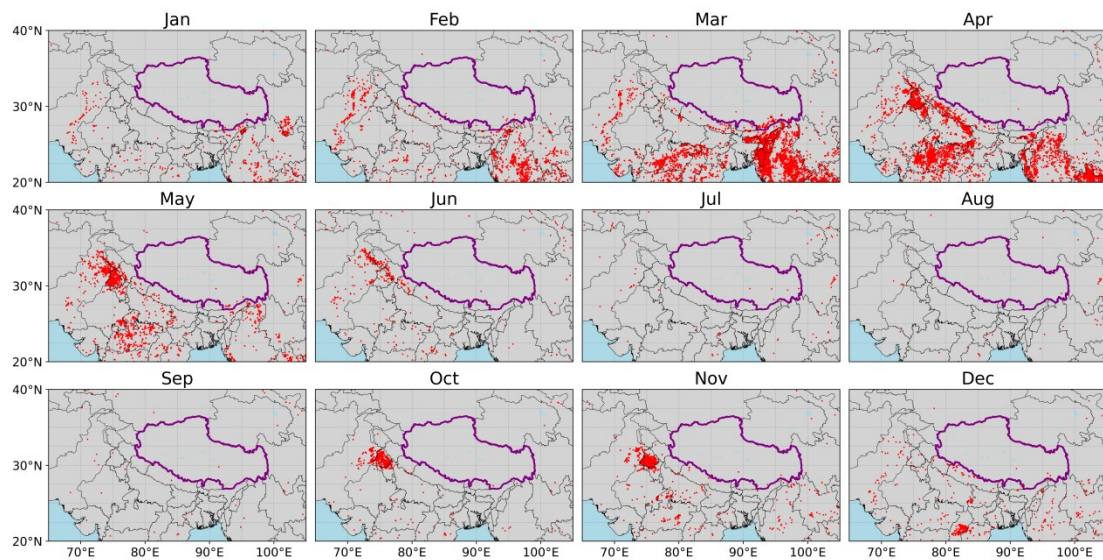

**Fig. S8.** Monthly aggregated distribution of MODIS fire points over the Qinghai-Tibet Plateau and surrounding regions from January to December 2022. The purple line delineates the boundary of the Tibetan Plateau.



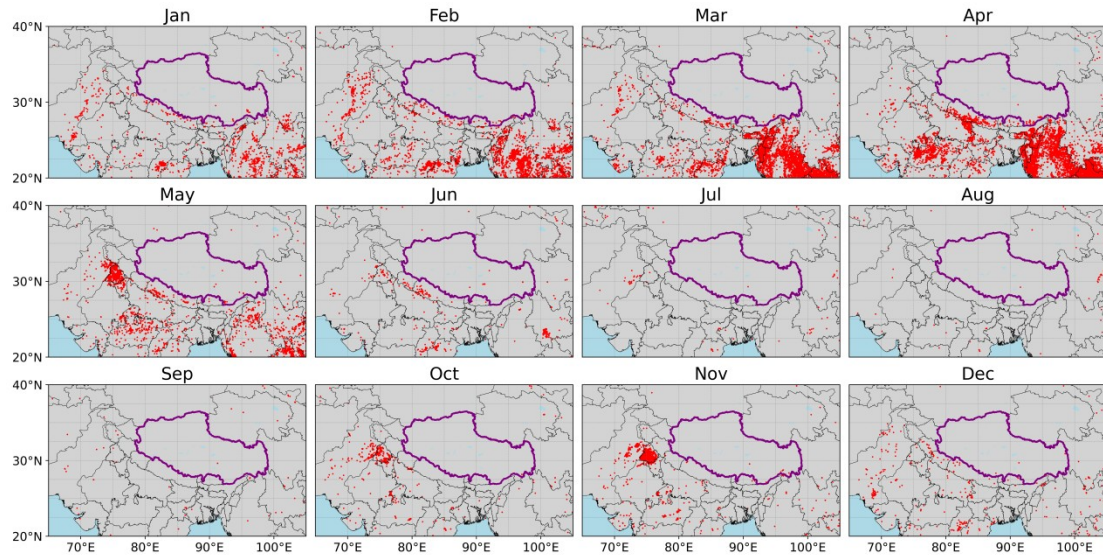

**Fig. S9.** Monthly aggregated distribution of MODIS fire points over the Qinghai-Tibet Plateau and surrounding regions from January to December 2023. The purple line delineates the boundary of the Tibetan Plateau.
